# Supplementary material
Source: PubMed Central journal article supplement (PMC4770791)
Supplement: NIHMS747924-supplement-04.pdf [file NIHMS747924-supplement-04.pdf]

## FIGURE LEGENDS

**Figure 1:** Disease duration (A) and overall FOG-Q scores (B) of PD subjects that presented with freezing of gait at the time of analysis (mean  $\pm$  SEM,  $p=0.05$ ). These data represent subjects with FOG (80 total, 32 wild type [WT], 35 heterozygous [HET], 13 homozygous [HOM]).

**Figure 2:** A) Semi-log graph of the wild-type (WT) and polymorphic (V81M) hTH residual activity plotted against time of incubation at 37°C. B) SDS-PAGE gel of hTH samples assessed following increasing incubation times.

**Supplementary Figure 1:** Single nucleotide change of G to A at residue 241 and the corresponding amino acid change. A) Location of the V81M SNP on a linear representation of the TH protein subunit (generated using DOG 2.0 from NM\_000360); B) Chromatograms of the sequencing of the nucleotides surrounding V81M in the human TH gene structure.
